# Supplementary material for: Digital Marine Bioprospecting: Mining New Neurotoxin Drug Candidates from the Transcriptomes of Cold-Water Sea Anemones
Source: Mar Drugs. 2012 Oct 18;10(10):2265–79. doi: 10.3390/md10102265 (PMC3497022; doi:10.3390/md10102265)
Supplement: Supplementary File 1: — PDF-Document (PDF, 75 KB) [file marinedrugs-10-02265-s001.pdf]

# Supplementary Materials

**Table S1.** 78 neurotoxins from 26 sea anemone species were downloaded from the NCBI database. 54 sodium channel toxins, 16 potassium channel toxins and 7 additional peptide toxins were applied as query sequences in tBlastn homology searches against two local transcriptome databases from the sea anemone species *Bolocera tuediae* and *Hormathia digitata*.

| Toxin type                      | Name                   | Size | GI number | Species                            |
|---------------------------------|------------------------|------|-----------|------------------------------------|
| Na+ channel neurotoxins Type I  | Ae I                   | 54aa | 22002011  | <i>Actinia equina</i>              |
| Na+ channel neurotoxins Type I  | AETX-1                 | 47aa | 57012555  | <i>Anemonia erythraea</i>          |
| Na+ channel neurotoxins Type I  | AFT-I                  | 47aa | 136522    | <i>Anthopleura fuscoviridis</i>    |
| Na+ channel neurotoxins Type I  | AFT-II                 | 48aa | 136524    | <i>Anthopleura fuscoviridis</i>    |
| Na+ channel neurotoxins Type I  | Am-III                 | 47aa | 57013132  | <i>Antheopsis maculata</i>         |
| Na+ channel neurotoxins Type I  | Anthopleurin-A (ApA)   | 49aa | 136530    | <i>Anthopleura xanthogrammica</i>  |
| Na+ channel neurotoxins Type I  | Anthopleurin-B (ApB)   | 49aa | 136531    | <i>Anthopleura xanthogrammica</i>  |
| Na+ channel neurotoxins Type I  | Anthopleurin-C (ApC)   | 47aa | 136532    | <i>Anthopleura elegantissima</i>   |
| Na+ channel neurotoxins Type I  | APE 1-1                | 47aa | 97217055  | <i>Anthopleura elegantissima</i>   |
| Na+ channel neurotoxins Type I  | APE 1-2                | 47aa | 97217059  | <i>Anthopleura elegantissima</i>   |
| Na+ channel neurotoxins Type I  | APE 2-1                | 47aa | 97217062  | <i>Anthopleura elegantissima</i>   |
| Na+ channel neurotoxins Type I  | APE 2-2                | 47aa | 97217066  | <i>Anthopleura elegantissima</i>   |
| Na+ channel neurotoxins Type I  | ATX-1                  | 46aa | 136521    | <i>Anemonia sulcata</i>            |
| Na+ channel neurotoxins Type I  | ATX-2                  | 47aa | 136523    | <i>Anemonia sulcata</i>            |
| Na+ channel neurotoxins Type I  | ATX-5                  | 46aa | 136529    | <i>Anemonia sulcata</i>            |
| Na+ channel neurotoxins Type I  | BcIII                  | 48aa | 47117401  | <i>Bunodosoma caissarum</i>        |
| Na+ channel neurotoxins Type I  | Bcg                    | 47aa | 292630904 | <i>Bunodosoma cangicum</i>         |
| Na+ channel neurotoxins Type I  | Bg-II                  | 48aa | 97217045  | <i>Bunodosoma granuliferum</i>     |
| Na+ channel neurotoxins Type I  | Bg-III                 | 48aa | 97217050  | <i>Bunodosoma granuliferum</i>     |
| Na+ channel neurotoxins Type I  | Cangitoxin (CGTX)      | 48aa | 18202429  | <i>Bunodosoma cangicum</i>         |
| Na+ channel neurotoxins Type I  | Cangitoxin II          | 48aa | 193806548 | <i>Bunodosoma cangicum</i>         |
| Na+ channel neurotoxins Type I  | Cangitoxin III         | 48aa | 193806549 | <i>Bunodosoma cangicum</i>         |
| Na+ channel neurotoxins Type I  | CgNa                   | 47aa | 119367403 | <i>Condylactis gigantea</i>        |
| Na+ channel neurotoxins Type I  | Cp-1                   | 47aa | 306756325 | <i>Condylactis passiflora</i>      |
| Na+ channel neurotoxins Type I  | Gigantoxin II (GigtII) | 44aa | 57012800  | <i>Stichodactyla gigantea</i>      |
| Na+ channel neurotoxins Type I  | Hk2                    | 47aa | 158706398 | <i>Anthopleura</i> sp. 'Zhanjiang' |
| Na+ channel neurotoxins Type I  | Hk7                    | 47aa | 158706399 | <i>Anthopleura</i> sp. 'Zhanjiang' |
| Na+ channel neurotoxins Type I  | Hk8                    | 47aa | 158706400 | <i>Anthopleura</i> sp. 'Zhanjiang' |
| Na+ channel neurotoxins Type I  | Hk16                   | 47aa | 158706397 | <i>Anthopleura</i> sp. 'Zhanjiang' |
| Na+ channel neurotoxins Type I  | PCR1                   | 47aa | 158706390 | <i>Anthopleura xanthogrammica</i>  |
| Na+ channel neurotoxins Type I  | PCR2                   | 47aa | 158706391 | <i>Anthopleura xanthogrammica</i>  |
| Na+ channel neurotoxins Type I  | PCR3                   | 47aa | 158706392 | <i>Anthopleura xanthogrammica</i>  |
| Na+ channel neurotoxins Type I  | PCR4                   | 47aa | 158706393 | <i>Anthopleura xanthogrammica</i>  |
| Na+ channel neurotoxins Type I  | PCR5                   | 47aa | 158706394 | <i>Anthopleura xanthogrammica</i>  |
| Na+ channel neurotoxins Type I  | PCR6                   | 49aa | 158706395 | <i>Anthopleura xanthogrammica</i>  |
| Na+ channel neurotoxins Type I  | PCR7                   | 49aa | 158706396 | <i>Anthopleura xanthogrammica</i>  |
| Na+ channel neurotoxins Type I  | Rc-1                   | 47aa | 158706401 | <i>Heteractis crispa</i>           |
| Na+ channel neurotoxins Type II | Delta-thalatoxin-Ca1a  | 49aa | 322518481 | <i>Cryptodendrum adhaesivum</i>    |
| Na+ channel neurotoxins Type II | Delta-thalatoxin-Ta1a  | 49aa | 322518534 | <i>Thalassianthus aster</i>        |
| Na+ channel neurotoxins Type II | Delta-thalatoxin-Hh1x  | 49aa | 322518561 | <i>Heterodactyla hemprichi</i>     |

Table S1. Cont.

|                                              |                          |      |           |                                  |
|----------------------------------------------|--------------------------|------|-----------|----------------------------------|
| Na <sup>+</sup> channel neurotoxins Type II  | Halcurin                 | 47aa | 158705827 | <i>Halcurias carlgreni</i>       |
| Na <sup>+</sup> channel neurotoxins Type II  | Gigantoxin III (GigtIII) | 48aa | 57012798  | <i>Stichodactyla gigantea</i>    |
| Na <sup>+</sup> channel neurotoxins Type II  | Nv3-3                    | 47aa | 306756340 | <i>Nematostella vectensis</i>    |
| Na <sup>+</sup> channel neurotoxins Type II  | RpII                     | 48aa | 136525    | <i>Radianthus paumotensis</i>    |
| Na <sup>+</sup> channel neurotoxins Type II  | RpIII                    | 48aa | 136528    | <i>Radianthus paumotensis</i>    |
| Na <sup>+</sup> channel neurotoxins Type II  | RTX-I (RmI)              | 48aa | 401226    | <i>Heteractis crispa</i>         |
| Na <sup>+</sup> channel neurotoxins Type II  | RTX-II (Rm2)             | 48aa | 401227    | <i>Heteractis crispa</i>         |
| Na <sup>+</sup> channel neurotoxins Type II  | RTX-III (Rm3)            | 48aa | 401228    | <i>Heteractis crispa</i>         |
| Na <sup>+</sup> channel neurotoxins Type II  | RTX-V (Rm5)              | 47aa | 401230    | <i>Heteractis crispa</i>         |
| Na <sup>+</sup> channel neurotoxins Type II  | SHP-I (ShI)              | 48aa | 136512    | <i>Stichodactyla helianthus</i>  |
| Na <sup>+</sup> channel neurotoxins Type III | Calitoxin-1 (CLX-1)      | 46aa | 1352093   | <i>Calliactis parasitica</i>     |
| Na <sup>+</sup> channel neurotoxins Type III | Calitoxin-2 (CLX-2)      | 46aa | 1352094   | <i>Calliactis parasitica</i>     |
| Na <sup>+</sup> channel neurotoxins          | ATX-III                  | 27aa | 136526    | <i>Anemonia sulcata</i>          |
| No assigned type                             |                          |      |           |                                  |
| Na <sup>+</sup> channel neurotoxins          | PA-TX                    | 31aa | 136527    | <i>Entacmaea quadricolor</i>     |
| No assigned type                             |                          |      |           |                                  |
| K <sup>+</sup> channel neurotoxins Type I    | Aek                      | 36aa | 6226209   | <i>Actinia equina</i>            |
| K <sup>+</sup> channel neurotoxins Type I    | AETX-K                   | 34aa | 121953299 | <i>Anemonia erythraea</i>        |
| K <sup>+</sup> channel neurotoxins Type I    | Bgk                      | 37aa | 2506190   | <i>Bunodosoma granuliferum</i>   |
| K <sup>+</sup> channel neurotoxins Type I    | HmK                      | 35aa | 97217083  | <i>Heteractis magnifica</i>      |
| K <sup>+</sup> channel neurotoxins Type I    | Kaliseptin (AsKS)        | 36aa | 55976776  | <i>Anemonia sulcata</i>          |
| K <sup>+</sup> channel neurotoxins Type I    | ShK                      | 35aa | 136540    | <i>Stichodactyla helianthus</i>  |
| K <sup>+</sup> channel neurotoxins Type II   | Kalicludine-1 (AsKC1)    | 58aa | 1181912   | <i>Anemonia sulcata</i>          |
| K <sup>+</sup> channel neurotoxins Type II   | Kalicludine-2 (AsKC2)    | 58aa | 1181913   | <i>Anemonia sulcata</i>          |
| K <sup>+</sup> channel neurotoxins Type II   | Kalicludine-3 (AsKC3)    | 59aa | 1181914   | <i>Anemonia sulcata</i>          |
| K <sup>+</sup> channel neurotoxins Type III  | Am-2                     | 46aa | 57013134  | <i>Antheopsis maculata</i>       |
| K <sup>+</sup> channel neurotoxins Type III  | APETx1                   | 42aa | 47605396  | <i>Anthopleura elegantissima</i> |
| K <sup>+</sup> channel neurotoxins Type III  | APETx2                   | 42aa | 47605397  | <i>Anthopleura elegantissima</i> |
| K <sup>+</sup> channel neurotoxins Type III  | BDS-1                    | 43aa | 114907    | <i>Anemonia sulcata</i>          |
| K <sup>+</sup> channel neurotoxins Type III  | BDS-2                    | 43aa | 25008168  | <i>Anemonia sulcata</i>          |
| K <sup>+</sup> channel neurotoxins           | APEKTx1                  | 65aa | 338817561 | <i>Anthopleura elegantissima</i> |
| No assigned type                             |                          |      |           |                                  |
| K <sup>+</sup> channel neurotoxins           | SHTX-3                   | 62aa | 206557800 | <i>Stichodactyla haddoni</i>     |
| No assigned type                             |                          |      |           |                                  |
| Other peptide toxins                         | Am-I                     | 27aa | 57013133  | <i>Antheopsis maculata</i>       |
| Other peptide toxins                         | Acrorhagin I             | 50aa | 90111958  | <i>Actinia equina</i>            |
| Other peptide toxins                         | Acrorhagin Ia            | 52aa | 90111957  | <i>Actinia equina</i>            |
| Other peptide toxins                         | Acrorhagin II            | 44aa | 90111960  | <i>Actinia equina</i>            |
| Other peptide toxins                         | Acrorhagin IIa           | 44aa | 90111959  | <i>Actinia equina</i>            |
| Other peptide toxins                         | AETX-II                  | 59aa | 57012556  | <i>Anemonia erythraea</i>        |
| Other peptide toxins                         | AETX-III                 | 59aa | 57012557  | <i>Anemonia erythraea</i>        |
| Other peptide toxins                         | Gigantoxin I (GigtI)     | 48aa | 57012799  | <i>Stichodactyla gigantea</i>    |

**Table S2.** Presented here are additional candidate neurotoxins, which have not passed our stringent criteria to be submitted as the best hits for potential new sea anemone neurotoxins. In the table are visualized complete sequences together with appropriate species and the best BLAST neurotoxin hits. E-values for the searches against SwissProt/UniProtKB database are also shown. All sequences with  $e > 1 \times 10^{-6}$  were not considered in our further analyses; alignments to AXPI and Kunitz/BPTI-like toxins are exceptions, since their ion channel inhibitory activity was not yet confirmed, despite their sequence and structural homology to the known neurotoxins.

| Sequence                                                                           | Specie             | Neurotoxin similarity     | e-value              |
|------------------------------------------------------------------------------------|--------------------|---------------------------|----------------------|
| IVYSVESQNTYCLDDCFGLSSQLSDRCKSPATCAVCTSDYQ<br>NCTPKCS                               | <i>B. tuediae</i>  | Acrorhagin I              | $6 \times 10^{-5}$   |
| ATSCRCVINHYFRHGTFWFGRRSCPSGHGYNKSCFRWFGRCC<br>VKF                                  | <i>B. tuediae</i>  | APETx2                    | $1.5 \times 10^{-2}$ |
| TSCRCVINHYFRHGTFWFGRRSCPSGHGYNKSCFRWFGRCC                                          | <i>B. tuediae</i>  | APETx2                    | $1 \times 10^{-2}$   |
| NCLLPKVVGPCRAAMPFYNSGNCEQFTYGGCDGNANNFN<br>TEEECKKAC                               | <i>B. tuediae</i>  | AXPI                      | $2 \times 10^{-27}$  |
| MSRLLIIFIVVTVVGCVMGKPNEGVVRDVEKRDGLRCLCDDQ<br>RTEGIKWLFCNCRSGWTQCGSGIMKCCHQ        | <i>H. digitata</i> | Gigt II                   | $2 \times 10^{-3}$   |
| MNRLILIVLIGVTLVALATGVRELKDESVLQKRAGTPCDCDTG<br>RYGGEDGIHWAFGCPSDEWKLCGTSSHYLIQIPCC | <i>H. digitata</i> | Gigt II                   | $2 \times 10^{-4}$   |
| DCKDKAYNCDRLQSACRTSWNIKTYWCKKTCGTC                                                 | <i>H. digitata</i> | AETX K                    | 4.8                  |
| MKRLYFLILAALVIVSHVEGQCSKDCYGTFTCYFGCTAITGP<br>KCFNDCQSVYAVCLNTGC                   | <i>H. digitata</i> | Acrorhagin I              | $2 \times 10^{-3}$   |
| LVHTARAADAGFCREECFSRQQLCMFSKNNCYNKKSCMSCV<br>KSFSPCLMGC                            | <i>H. digitata</i> | Acrorhagin I              | $6 \times 10^{-5}$   |
| ICKQPDYPGPCNSMRKRWFDFSHTGKCNSFNYGGCYGNENNF<br>ATQDLCHQRC                           | <i>H. digitata</i> | Kunitz/BPTI-like<br>toxin | $5 \times 10^{-5}$   |
| CFLPRTIGPCREYIPRFYNNRETRRCEAFGYGGCEGNANNYNT<br>KEECEQKC                            | <i>H. digitata</i> | AXPI                      | $2 \times 10^{-22}$  |
| ATSCRCVINHYFRHGTFWFGRRSCPSGHGYNKSCFRWFGRCC                                         | <i>H. digitata</i> | APETx2                    | $1.2 \times 10^{-2}$ |
| GLRCLCDDQRTEGIKWLFCNCRSGWTQCGSGIMKCCHQ                                             | <i>H. digitata</i> | PCR4                      | $3 \times 10^{-2}$   |
| CLLPKVTGPCRAAMPRIYYNSKSGNCEQFTYGGCDGNANNF<br>ATPEKCKAAC                            | <i>H. digitata</i> | AXPI                      | $5 \times 10^{-27}$  |
| CKQPDYPGPCNSMRKRWFDFSHTGKCNSFNYGGCYGNENNF<br>ATQDLCHQRC                            | <i>H. digitata</i> | Kunitz/BPTI-like<br>toxin | $5 \times 10^{-5}$   |

**Table S3.** Conserved domain hits for transcripts from *B. tuediae*.

| Query                   | PSSM-ID | From | To  | E-Value     | Bitscore | Accession | Short name             |
|-------------------------|---------|------|-----|-------------|----------|-----------|------------------------|
| Q#7 - >2464__F6AHOR30   | 206837  | 80   | 130 | 1.15669e-11 | 56.4395  | cl00101   | KU superfamily         |
| Q#7 - >2464__F6AHOR30   | 206837  | 35   | 78  | 4.47599e-07 | 43.3427  | cl00101   | KU superfamily         |
| Q#15 - >4998__F6AHOR30  | 206837  | 9    | 62  | 1.77243e-23 | 88.0258  | cl00101   | KU superfamily         |
| Q#19 - >8165__F6AHOR30  | 145792  | 3    | 28  | 5.22364e-05 | 37.6255  | cl10597   | Antistatin superfamily |
| Q#20 - >8165__F6AHOR30  | 206837  | 53   | 86  | 4.46384e-12 | 57.5951  | cl00101   | KU superfamily         |
| Q#26 - >8650__F6AHOR30  | 206837  | 36   | 89  | 5.51717e-17 | 70.6919  | cl00101   | KU superfamily         |
| Q#26 - >8650__F6AHOR30  | 145792  | 6    | 31  | 0.000612912 | 34.5439  | cl10597   | Antistatin superfamily |
| Q#31 - >13666__F6AHOR3  | 206837  | 19   | 72  | 1.66883e-15 | 66.8399  | cl00101   | KU superfamily         |
| Q#38 - >23218__F6AHOR3  | 206837  | 74   | 117 | 1.00642e-06 | 42.1871  | cl00101   | KU superfamily         |
| Q#38 - >23218__F6AHOR3  | 206834  | 20   | 60  | 1.11354e-06 | 41.8163  | cl00097   | KAZAL_FS superfamily   |
| Q#44 - >23234__F6AHOR3  | 206837  | 99   | 142 | 1.97856e-06 | 41.8019  | cl00101   | KU superfamily         |
| Q#44 - >23234__F6AHOR3  | 206834  | 45   | 85  | 2.38826e-06 | 41.4311  | cl00097   | KAZAL_FS superfamily   |
| Q#49 - >23491__F6AHOR3  | 206837  | 41   | 91  | 4.5733e-17  | 71.4623  | cl00101   | KU superfamily         |
| Q#62 - >29752__F6AHOR3  | 206837  | 49   | 99  | 2.94184e-16 | 68.7659  | cl00101   | KU superfamily         |
| Q#75 - >31486__F6AHOR3  | 206837  | 76   | 121 | 3.92096e-17 | 71.0771  | cl00101   | KU superfamily         |
| Q#75 - >31486__F6AHOR3  | 206837  | 1    | 33  | 4.84822e-07 | 42.9575  | cl00101   | KU superfamily         |
| Q#89 - >45378__F6AHOR3  | 206837  | 55   | 105 | 7.09721e-16 | 67.9955  | cl00101   | KU superfamily         |
| Q#92 - >45938__F6AHOR3  | 206837  | 26   | 76  | 7.06284e-18 | 73.3883  | cl00101   | KU superfamily         |
| Q#110 - >51059__F6AHOR3 | 206837  | 22   | 74  | 1.54493e-21 | 83.0183  | cl00101   | KU superfamily         |
| Q#115 - >56458__F6AHOR3 | 206837  | 92   | 111 | 0.000934937 | 34.967   | cl00101   | KU superfamily         |
| Q#116 - >56458__F6AHOR3 | 206837  | 111  | 137 | 5.6343e-07  | 43.7279  | cl00101   | KU superfamily         |
| Q#121 - >57768__F6AHOR3 | 206837  | 25   | 75  | 5.68647e-19 | 76.4699  | cl00101   | KU superfamily         |
| Q#129 - >59553__F6AHOR3 | 206837  | 55   | 107 | 4.99077e-19 | 76.4699  | cl00101   | KU superfamily         |
| Q#133 - >66372__F6AHOR3 | 206837  | 1    | 37  | 1.22138e-12 | 59.1359  | cl00101   | KU superfamily         |
| Q#141 - >66552__F6AHOR3 | 206837  | 9    | 62  | 4.47452e-15 | 66.0695  | cl00101   | KU superfamily         |
| Q#146 - >70813__F6AHOR3 | 145792  | 51   | 76  | 0.000161696 | 36.8551  | cl10597   | Antistatin superfamily |
| Q#147 - >70813__F6AHOR3 | 206837  | 81   | 134 | 2.01819e-20 | 80.7071  | cl00101   | KU superfamily         |
| Q#151 - >71226__F6AHOR3 | 206837  | 1    | 51  | 2.32753e-18 | 74.5439  | cl00101   | KU superfamily         |
| Q#159 - >74976__F6AHOR3 | 206837  | 48   | 98  | 3.72983e-17 | 71.4623  | cl00101   | KU superfamily         |
| Q#165 - >77553__F6AHOR3 | 206837  | 76   | 121 | 3.92096e-17 | 71.0771  | cl00101   | KU superfamily         |
| Q#165 - >77553__F6AHOR3 | 206837  | 1    | 33  | 4.84822e-07 | 42.9575  | cl00101   | KU superfamily         |
| Q#171 - >81167__F6AHOR3 | 206837  | 1    | 44  | 5.64265e-14 | 62.9879  | cl00101   | KU superfamily         |
| Q#176 - >85155__F6AHOR3 | 206837  | 22   | 74  | 6.11999e-23 | 87.2554  | cl00101   | KU superfamily         |
| Q#182 - >95260__F6AHOR3 | 206837  | 33   | 85  | 2.54859e-18 | 74.9291  | cl00101   | KU superfamily         |
| Q#188 - >95838__F6AHOR3 | 206837  | 82   | 134 | 2.88159e-11 | 55.2839  | cl00101   | KU superfamily         |
| Q#194 - >97653__F6AHOR3 | 206837  | 26   | 76  | 1.28095e-12 | 59.1359  | cl00101   | KU superfamily         |
| Q#200 - >104626__F6AHOR | 206837  | 79   | 115 | 4.51544e-13 | 60.6767  | cl00101   | KU superfamily         |
| Q#207 - >106141__F6AHOR | 206837  | 45   | 98  | 3.07408e-21 | 82.6331  | cl00101   | KU superfamily         |
| Q#211 - >106345__F6AHOR | 206837  | 42   | 95  | 1.94946e-14 | 64.1435  | cl00101   | KU superfamily         |
| Q#211 - >106345__F6AHOR | 206837  | 1    | 40  | 4.39688e-06 | 40.7449  | cl00101   | KU superfamily         |
| Q#218 - >113893__F6AHOR | 206837  | 40   | 88  | 1.27895e-19 | 77.6255  | cl00101   | KU superfamily         |
| Q#224 - >126829__F6AHOR | 206837  | 49   | 99  | 1.11768e-17 | 73.3883  | cl00101   | KU superfamily         |
| Q#231 - >132715__F6AHOR | 206837  | 58   | 107 | 4.57007e-18 | 73.3883  | cl00101   | KU superfamily         |
| Q#242 - >157576__F6AHOR | 206837  | 22   | 66  | 2.55684e-16 | 69.9215  | cl00101   | KU superfamily         |
| Q#249 - >160540__F6AHOR | 206837  | 22   | 74  | 5.37958e-24 | 89.9518  | cl00101   | KU superfamily         |
| Q#253 - >161209__F6AHOR | 206837  | 50   | 100 | 4.26916e-18 | 74.5439  | cl00101   | KU superfamily         |
| Q#261 - >161620__F6AHOR | 206837  | 46   | 99  | 4.10535e-14 | 63.3731  | cl00101   | KU superfamily         |
| Q#261 - >161620__F6AHOR | 206837  | 1    | 44  | 4.78347e-07 | 43.3427  | cl00101   | KU superfamily         |
| Q#267 - >161886__F6AHOR | 206837  | 36   | 86  | 9.76864e-18 | 73.3883  | cl00101   | KU superfamily         |

Table S3. Cont.

|                         |        |     |     |             |         |         |                        |
|-------------------------|--------|-----|-----|-------------|---------|---------|------------------------|
| Q#278 - >175478__F6AHOR | 206837 | 57  | 105 | 1.75054e-20 | 79.9367 | cl00101 | KU superfamily         |
| Q#284 - >178435__F6AHOR | 206837 | 1   | 45  | 3.39143e-16 | 69.1511 | cl00101 | KU superfamily         |
| Q#289 - >178675__F6AHOR | 206837 | 38  | 78  | 2.54386e-18 | 74.5439 | cl00101 | KU superfamily         |
| Q#291 - >178675__F6AHOR | 206837 | 1   | 23  | 3.76934e-08 | 46.4243 | cl00101 | KU superfamily         |
| Q#301 - >182000__F6AHOR | 206837 | 1   | 27  | 4.20534e-08 | 46.4243 | cl00101 | KU superfamily         |
| Q#308 - >183748__F6AHOR | 206837 | 61  | 114 | 4.77419e-14 | 62.9879 | cl00101 | KU superfamily         |
| Q#308 - >183748__F6AHOR | 206837 | 16  | 59  | 5.84551e-07 | 43.3427 | cl00101 | KU superfamily         |
| Q#315 - >190363__F6AHOR | 206837 | 56  | 109 | 1.21028e-17 | 73.0031 | cl00101 | KU superfamily         |
| Q#325 - >193381__F6AHOR | 206837 | 118 | 156 | 9.26395e-08 | 45.2687 | cl00101 | KU superfamily         |
| Q#338 - >200100__F6AHOR | 145792 | 5   | 30  | 1.36368e-05 | 39.1663 | cl10597 | Antistatin superfamily |
| Q#339 - >200100__F6AHOR | 206837 | 35  | 85  | 1.14613e-19 | 78.0107 | cl00101 | KU superfamily         |
| Q#345 - >201434__F6AHOR | 206837 | 48  | 98  | 6.47289e-17 | 71.4623 | cl00101 | KU superfamily         |
| Q#349 - >204196__F6AHOR | 206837 | 25  | 75  | 4.55386e-20 | 79.5515 | cl00101 | KU superfamily         |
| Q#356 - >213209__F6AHOR | 206837 | 2   | 44  | 2.62284e-16 | 69.5363 | cl00101 | KU superfamily         |
| Q#362 - >220408__F6AHOR | 206837 | 44  | 92  | 8.48127e-20 | 78.7811 | cl00101 | KU superfamily         |
| Q#367 - >223700__F6AHOR | 206837 | 19  | 72  | 2.51976e-15 | 66.4547 | cl00101 | KU superfamily         |
| Q#374 - >224991__F6AHOR | 206837 | 49  | 99  | 3.25071e-17 | 71.8475 | cl00101 | KU superfamily         |
| Q#379 - >225260__F6AHOR | 206837 | 118 | 156 | 9.26395e-08 | 45.2687 | cl00101 | KU superfamily         |
| Q#385 - >225321__F6AHOR | 206837 | 83  | 136 | 1.50182e-11 | 56.0543 | cl00101 | KU superfamily         |
| Q#399 - >231964__F6AHOR | 206837 | 18  | 62  | 1.22149e-15 | 67.9955 | cl00101 | KU superfamily         |
| Q#404 - >240118__F6AHOR | 206837 | 104 | 143 | 2.44712e-08 | 47.1947 | cl00101 | KU superfamily         |
| Q#427 - >246912__F6AHOR | 206834 | 57  | 97  | 8.92126e-07 | 42.5867 | cl00097 | KAZAL_FS superfamily   |
| Q#427 - >246912__F6AHOR | 206837 | 111 | 147 | 8.12925e-05 | 37.6634 | cl00101 | KU superfamily         |
| Q#427 - >246912__F6AHOR | 206798 | 1   | 24  | 0.00612266  | 32.4348 | cl00043 | CCP superfamily        |
| Q#435 - >249696__F6AHOR | 206837 | 22  | 75  | 6.74069e-21 | 81.4775 | cl00101 | KU superfamily         |
| Q#440 - >253934__F6AHOR | 206837 | 130 | 171 | 8.11216e-14 | 62.6027 | cl00101 | KU superfamily         |
| Q#445 - >260505__F6AHOR | 206837 | 23  | 76  | 1.3827e-21  | 83.4035 | cl00101 | KU superfamily         |
| Q#452 - >268222__F6AHOR | 206837 | 38  | 88  | 6.18423e-18 | 74.1587 | cl00101 | KU superfamily         |
| Q#458 - >269325__F6AHOR | 206837 | 97  | 146 | 5.53361e-18 | 73.7735 | cl00101 | KU superfamily         |
| Q#458 - >269325__F6AHOR | 206837 | 1   | 54  | 9.51654e-17 | 70.6919 | cl00101 | KU superfamily         |
| Q#464 - >271769__F6AHOR | 206837 | 58  | 104 | 2.81782e-13 | 61.0619 | cl00101 | KU superfamily         |
| Q#464 - >271769__F6AHOR | 145792 | 28  | 53  | 0.0011122   | 34.5439 | cl10597 | Antistatin superfamily |
| Q#469 - >274477__F6AHOR | 206837 | 35  | 85  | 8.05198e-16 | 68.3807 | cl00101 | KU superfamily         |
| Q#476 - >275702__F6AHOR | 206837 | 126 | 158 | 7.91546e-08 | 45.6539 | cl00101 | KU superfamily         |
| Q#477 - >275702__F6AHOR | 206837 | 61  | 104 | 7.34039e-07 | 43.3427 | cl00101 | KU superfamily         |
| Q#477 - >275702__F6AHOR | 206834 | 7   | 47  | 7.38092e-07 | 42.9719 | cl00097 | KAZAL_FS superfamily   |
| Q#482 - >278612__F6AHOR | 206837 | 86  | 128 | 1.46195e-12 | 59.1359 | cl00101 | KU superfamily         |
| Q#487 - >281690__F6AHOR | 206837 | 82  | 100 | 0.00233342  | 33.7767 | cl00101 | KU superfamily         |
| Q#488 - >281690__F6AHOR | 206837 | 56  | 81  | 5.32912e-06 | 41.0315 | cl00101 | KU superfamily         |
| Q#494 - >284423__F6AHOR | 206837 | 7   | 60  | 8.85584e-20 | 79.1663 | cl00101 | KU superfamily         |
| Q#494 - >284423__F6AHOR | 206863 | 84  | 133 | 3.87357e-13 | 61.2092 | cl00150 | TY superfamily         |
| Q#501 - >300003__F6AHOR | 206837 | 19  | 72  | 4.91268e-19 | 76.8551 | cl00101 | KU superfamily         |
| Q#506 - >304258__F6AHOR | 206834 | 7   | 47  | 4.64229e-07 | 43.3571 | cl00097 | KAZAL_FS superfamily   |
| Q#506 - >304258__F6AHOR | 206837 | 61  | 104 | 7.26437e-07 | 42.9575 | cl00101 | KU superfamily         |
| Q#506 - >304258__F6AHOR | 206837 | 106 | 136 | 2.2076e-05  | 39.1695 | cl00101 | KU superfamily         |
| Q#518 - >311446__F6AHOR | 206868 | 68  | 90  | 0.00687527  | 32.3411 | cl00156 | WAP superfamily        |
| Q#525 - >311642__F6AHOR | 206837 | 1   | 36  | 1.76392e-10 | 52.9727 | cl00101 | KU superfamily         |
| Q#525 - >311642__F6AHOR | 206863 | 51  | 98  | 2.92587e-09 | 50.0384 | cl00150 | TY superfamily         |
| Q#542 - >328359__F6AHOR | 206837 | 36  | 89  | 4.32946e-17 | 71.0771 | cl00101 | KU superfamily         |
| Q#542 - >328359__F6AHOR | 145792 | 6   | 31  | 0.000758282 | 34.5439 | cl10597 | Antistatin superfamily |

Table S3. Cont.

|                         |        |     |     |             |         |         |                      |
|-------------------------|--------|-----|-----|-------------|---------|---------|----------------------|
| Q#548 - >330186__F6AHOR | 206837 | 73  | 126 | 3.03194e-17 | 71.8475 | cl00101 | KU superfamily       |
| Q#559 - >337501__F6AHOR | 206837 | 31  | 83  | 2.44778e-19 | 78.0107 | cl00101 | KU superfamily       |
| Q#566 - >340377__F6AHOR | 206837 | 40  | 90  | 9.1323e-17  | 70.3067 | cl00101 | KU superfamily       |
| Q#571 - >349362__F6AHOR | 206837 | 61  | 107 | 8.88196e-18 | 73.3883 | cl00101 | KU superfamily       |
| Q#577 - >351014__F6AHOR | 206837 | 2   | 33  | 2.72017e-11 | 56.8247 | cl00101 | KU superfamily       |
| Q#591 - >365577__F6AHOR | 206837 | 17  | 61  | 2.06306e-14 | 64.5287 | cl00101 | KU superfamily       |
| Q#607 - >376827__F6AHOR | 206837 | 49  | 84  | 4.13996e-10 | 52.2023 | cl00101 | KU superfamily       |
| Q#615 - >382259__F6AHOR | 206837 | 58  | 106 | 1.37088e-20 | 80.3219 | cl00101 | KU superfamily       |
| Q#619 - >389206__F6AHOR | 206837 | 19  | 63  | 2.49605e-16 | 69.9215 | cl00101 | KU superfamily       |
| Q#625 - >394231__F6AHOR | 206837 | 81  | 99  | 0.000588834 | 35.7027 | cl00101 | KU superfamily       |
| Q#626 - >394231__F6AHOR | 206837 | 49  | 80  | 1.28308e-08 | 47.9651 | cl00101 | KU superfamily       |
| Q#632 - >401702__F6AHOR | 206837 | 87  | 130 | 1.76416e-06 | 41.8019 | cl00101 | KU superfamily       |
| Q#632 - >401702__F6AHOR | 206834 | 33  | 73  | 1.90485e-06 | 41.8163 | cl00097 | KAZAL_FS superfamily |
| Q#637 - >417378__F6AHOR | 206837 | 1   | 42  | 4.28802e-16 | 68.7659 | cl00101 | KU superfamily       |
| Q#644 - >418224__F6AHOR | 206837 | 32  | 82  | 8.30364e-22 | 85.3294 | cl00101 | KU superfamily       |
| Q#645 - >418224__F6AHOR | 206837 | 1   | 21  | 8.35841e-07 | 44.1131 | cl00101 | KU superfamily       |
| Q#650 - >423007__F6AHOR | 206837 | 33  | 83  | 2.27701e-17 | 72.6179 | cl00101 | KU superfamily       |
| Q#655 - >429340__F6AHOR | 206837 | 69  | 120 | 6.15555e-13 | 60.2915 | cl00101 | KU superfamily       |
| Q#663 - >434736__F6AHOR | 206837 | 23  | 74  | 1.31599e-19 | 78.7811 | cl00101 | KU superfamily       |
| Q#668 - >437132__F6AHOR | 206837 | 24  | 77  | 6.80049e-17 | 69.9215 | cl00101 | KU superfamily       |
| Q#675 - >441767__F6AHOR | 206837 | 55  | 99  | 6.00893e-14 | 62.9879 | cl00101 | KU superfamily       |
| Q#679 - >454132__F6AHOR | 206837 | 45  | 85  | 9.20785e-15 | 65.2991 | cl00101 | KU superfamily       |
| Q#687 - >455427__F6AHOR | 206837 | 36  | 86  | 2.13653e-17 | 73.0031 | cl00101 | KU superfamily       |
| Q#691 - >463355__F6AHOR | 206837 | 69  | 93  | 7.41117e-08 | 45.6539 | cl00101 | KU superfamily       |
| Q#699 - >464645__F6AHOR | 206837 | 66  | 119 | 4.63753e-17 | 71.0771 | cl00101 | KU superfamily       |
| Q#711 - >470526__F6AHOR | 206837 | 1   | 24  | 3.14796e-09 | 51.4319 | cl00101 | KU superfamily       |
| Q#723 - >477373__F6AHOR | 206837 | 27  | 80  | 2.80264e-13 | 62.6027 | cl00101 | KU superfamily       |
| Q#728 - >479079__F6AHOR | 206837 | 41  | 75  | 1.88113e-09 | 50.6615 | cl00101 | KU superfamily       |
| Q#728 - >479079__F6AHOR | 206837 | 108 | 134 | 3.92967e-06 | 41.5153 | cl00101 | KU superfamily       |
| Q#729 - >479079__F6AHOR | 206837 | 75  | 93  | 6.68073e-05 | 38.3991 | cl00101 | KU superfamily       |
| Q#734 - >481987__F6AHOR | 206837 | 94  | 134 | 7.37123e-13 | 59.9063 | cl00101 | KU superfamily       |
| Q#746 - >486382__F6AHOR | 206837 | 43  | 79  | 3.00012e-16 | 69.9215 | cl00101 | KU superfamily       |
| Q#747 - >486382__F6AHOR | 206837 | 1   | 21  | 1.05182e-06 | 44.1131 | cl00101 | KU superfamily       |
| Q#753 - >489552__F6AHOR | 206837 | 12  | 65  | 1.5906e-21  | 83.7887 | cl00101 | KU superfamily       |
| Q#759 - >490217__F6AHOR | 206837 | 1   | 33  | 5.22572e-09 | 49.1207 | cl00101 | KU superfamily       |
| Q#770 - >494438__F6AHOR | 206837 | 32  | 76  | 1.18211e-20 | 82.2479 | cl00101 | KU superfamily       |
| Q#771 - >494438__F6AHOR | 206837 | 1   | 21  | 2.16253e-06 | 42.9575 | cl00101 | KU superfamily       |
| Q#776 - >497749__F6AHOR | 206837 | 55  | 92  | 1.00043e-14 | 65.2991 | cl00101 | KU superfamily       |
| Q#783 - >500153__F6AHOR | 206837 | 40  | 69  | 1.1311e-06  | 43.3427 | cl00101 | KU superfamily       |
| Q#795 - >505741__F6AHOR | 206837 | 5   | 58  | 1.55494e-15 | 67.2251 | cl00101 | KU superfamily       |
| Q#811 - >516085__F6AHOR | 206837 | 50  | 83  | 9.20762e-14 | 62.9879 | cl00101 | KU superfamily       |
| Q#819 - >519374__F6AHOR | 206837 | 1   | 27  | 8.23593e-09 | 50.2763 | cl00101 | KU superfamily       |
| Q#823 - >524899__F6AHOR | 206837 | 35  | 78  | 3.89509e-08 | 47.1947 | cl00101 | KU superfamily       |
| Q#823 - >524899__F6AHOR | 206837 | 80  | 111 | 2.10784e-06 | 42.2511 | cl00101 | KU superfamily       |
| Q#825 - >524899__F6AHOR | 206837 | 110 | 131 | 0.00953466  | 32.2706 | cl00101 | KU superfamily       |
| Q#830 - >527095__F6AHOR | 206837 | 77  | 106 | 1.9529e-08  | 47.9651 | cl00101 | KU superfamily       |
| Q#831 - >527095__F6AHOR | 206837 | 58  | 75  | 9.31871e-05 | 38.0486 | cl00101 | KU superfamily       |
| Q#835 - >527127__F6AHOR | 206837 | 43  | 91  | 5.12645e-21 | 82.2479 | cl00101 | KU superfamily       |
| Q#841 - >527367__F6AHOR | 206837 | 77  | 114 | 1.15602e-13 | 61.8323 | cl00101 | KU superfamily       |
| Q#848 - >527587__F6AHOR | 206837 | 19  | 71  | 5.91195e-07 | 43.4067 | cl00101 | KU superfamily       |
| Q#855 - >532824__F6AHOR | 206837 | 12  | 65  | 4.93064e-20 | 80.7071 | cl00101 | KU superfamily       |
| Q#861 - >533064__F6AHOR | 206837 | 10  | 35  | 1.18379e-05 | 40.7449 | cl00101 | KU superfamily       |

**Table S4.** Conserved domain hits for transcripts from *H. digitata*.

| Query                   | PSSM-ID | From | To  | E-Value     | Bitscore | Accession | Short name           |
|-------------------------|---------|------|-----|-------------|----------|-----------|----------------------|
| Q#1 - >11030__F6AHOR3   | 206837  | 67   | 120 | 2.37895e-16 | 69.5363  | cl00101   | KU superfamily       |
| Q#1 - >11030__F6AHOR3   | 206837  | 21   | 65  | 3.13787e-13 | 61.0619  | cl00101   | KU superfamily       |
| Q#8 - >15798__F6AHOR3   | 206837  | 14   | 66  | 9.22877e-18 | 73.3883  | cl00101   | KU superfamily       |
| Q#14 - >17716__F6AHOR3  | 206837  | 5    | 42  | 5.63908e-13 | 60.2915  | cl00101   | KU superfamily       |
| Q#15 - >17716__F6AHOR3  | 206837  | 62   | 115 | 5.56268e-20 | 79.1663  | cl00101   | KU superfamily       |
| Q#19 - >19614__F6AHOR3  | 206837  | 24   | 76  | 6.02486e-17 | 71.0771  | cl00101   | KU superfamily       |
| Q#19 - >19614__F6AHOR3  | 206837  | 82   | 135 | 7.14784e-17 | 70.6919  | cl00101   | KU superfamily       |
| Q#26 - >21912__F6AHOR3  | 206834  | 19   | 59  | 9.47291e-07 | 42.2015  | cl00097   | KAZAL_FS superfamily |
| Q#26 - >21912__F6AHOR3  | 206837  | 73   | 116 | 7.07491e-06 | 40.2611  | cl00101   | KU superfamily       |
| Q#32 - >22787__F6AHOR3  | 206837  | 55   | 107 | 4.71983e-19 | 76.8551  | cl00101   | KU superfamily       |
| Q#38 - >37382__F6AHOR3  | 206837  | 8    | 57  | 2.33086e-12 | 58.3655  | cl00101   | KU superfamily       |
| Q#45 - >47053__F6AHOR3  | 206837  | 39   | 91  | 1.6203e-16  | 69.9215  | cl00101   | KU superfamily       |
| Q#45 - >47053__F6AHOR3  | 206837  | 1    | 37  | 0.000113337 | 37.2782  | cl00101   | KU superfamily       |
| Q#51 - >47453__F6AHOR3  | 206837  | 53   | 106 | 2.89042e-20 | 79.5515  | cl00101   | KU superfamily       |
| Q#56 - >52055__F6AHOR3  | 206837  | 1    | 47  | 9.73219e-20 | 78.3959  | cl00101   | KU superfamily       |
| Q#62 - >58283__F6AHOR3  | 210239  | 1    | 35  | 8.67185e-05 | 37.0492  | cl15839   | ShK superfamily      |
| Q#67 - >60139__F6AHOR3  | 206837  | 54   | 107 | 9.49689e-18 | 73.0031  | cl00101   | KU superfamily       |
| Q#75 - >62342__F6AHOR3  | 109750  | 64   | 105 | 2.60806e-05 | 38.9921  | cl02937   | Toxin_4 superfamily  |
| Q#81 - >71393__F6AHOR3  | 109750  | 64   | 106 | 0.000105549 | 37.8365  | cl02937   | Toxin_4 superfamily  |
| Q#85 - >73916__F6AHOR3  | 206837  | 103  | 152 | 6.49015e-18 | 73.7735  | cl00101   | KU superfamily       |
| Q#91 - >73949__F6AHOR3  | 206837  | 111  | 130 | 0.000177065 | 36.893   | cl00101   | KU superfamily       |
| Q#93 - >73949__F6AHOR3  | 206837  | 130  | 161 | 1.3407e-05  | 39.9745  | cl00101   | KU superfamily       |
| Q#97 - >77215__F6AHOR3  | 206837  | 39   | 89  | 4.56801e-20 | 79.1663  | cl00101   | KU superfamily       |
| Q#103 - >79253__F6AHOR3 | 206837  | 58   | 111 | 4.52051e-18 | 74.1587  | cl00101   | KU superfamily       |
| Q#109 - >80503__F6AHOR3 | 206837  | 108  | 137 | 1.43138e-08 | 47.9651  | cl00101   | KU superfamily       |
| Q#111 - >80503__F6AHOR3 | 206837  | 85   | 105 | 6.31744e-05 | 38.4338  | cl00101   | KU superfamily       |
| Q#116 - >81965__F6AHOR3 | 206837  | 20   | 72  | 1.60694e-18 | 75.3143  | cl00101   | KU superfamily       |
| Q#128 - >84436__F6AHOR3 | 206837  | 1    | 48  | 1.48321e-16 | 69.5363  | cl00101   | KU superfamily       |
| Q#135 - >84769__F6AHOR3 | 206837  | 71   | 114 | 2.97193e-14 | 63.3731  | cl00101   | KU superfamily       |
| Q#140 - >86011__F6AHOR3 | 206837  | 110  | 123 | 0.00487269  | 32.6558  | cl00101   | KU superfamily       |
| Q#141 - >86011__F6AHOR3 | 206837  | 81   | 111 | 1.63267e-06 | 42.1871  | cl00101   | KU superfamily       |
| Q#145 - >87981__F6AHOR3 | 206837  | 48   | 98  | 6.00278e-23 | 86.8702  | cl00101   | KU superfamily       |
| Q#153 - >97322__F6AHOR3 | 206837  | 3    | 55  | 2.08671e-17 | 72.2327  | cl00101   | KU superfamily       |
| Q#153 - >97322__F6AHOR3 | 206837  | 61   | 114 | 2.50843e-17 | 72.2327  | cl00101   | KU superfamily       |
| Q#157 - >99212__F6AHOR3 | 206837  | 37   | 89  | 7.27845e-19 | 76.0847  | cl00101   | KU superfamily       |
| Q#164 - >99275__F6AHOR3 | 206837  | 71   | 102 | 7.30272e-11 | 54.1283  | cl00101   | KU superfamily       |
| Q#170 - >99610__F6AHOR3 | 206837  | 58   | 111 | 4.94896e-19 | 76.4699  | cl00101   | KU superfamily       |
| Q#177 - >105411__F6AHOR | 206834  | 20   | 60  | 1.07629e-06 | 42.2015  | cl00097   | KAZAL_FS superfamily |
| Q#177 - >105411__F6AHOR | 206837  | 74   | 117 | 6.74068e-06 | 40.2611  | cl00101   | KU superfamily       |
| Q#183 - >107262__F6AHOR | 206837  | 29   | 79  | 1.03265e-18 | 75.6995  | cl00101   | KU superfamily       |
| Q#188 - >111656__F6AHOR | 206837  | 1    | 42  | 6.72471e-10 | 51.4319  | cl00101   | KU superfamily       |
| Q#195 - >114672__F6AHOR | 206837  | 4    | 36  | 5.61506e-12 | 57.5951  | cl00101   | KU superfamily       |
| Q#200 - >115529__F6AHOR | 206837  | 125  | 142 | 0.000601597 | 35.3175  | cl00101   | KU superfamily       |
| Q#201 - >115529__F6AHOR | 206837  | 92   | 121 | 7.23315e-06 | 40.6463  | cl00101   | KU superfamily       |
| Q#205 - >117052__F6AHOR | 207622  | 83   | 146 | 8.7964e-06  | 41.3419  | cl02512   | NTR_like superfamily |
| Q#207 - >117052__F6AHOR | 206837  | 1    | 36  | 7.43594e-13 | 59.9063  | cl00101   | KU superfamily       |
| Q#213 - >119172__F6AHOR | 206837  | 58   | 111 | 4.78691e-19 | 76.4699  | cl00101   | KU superfamily       |
| Q#218 - >120641__F6AHOR | 206837  | 79   | 124 | 2.27243e-18 | 74.9291  | cl00101   | KU superfamily       |
| Q#225 - >121730__F6AHOR | 206837  | 84   | 127 | 2.59837e-13 | 61.0619  | cl00101   | KU superfamily       |
| Q#231 - >124434__F6AHOR | 206837  | 66   | 104 | 5.83167e-11 | 54.5135  | cl00101   | KU superfamily       |

Table S4. Cont.

|                         |        |     |     |             |         |         |                      |
|-------------------------|--------|-----|-----|-------------|---------|---------|----------------------|
| Q#237 - >131471__F6AHOR | 206837 | 49  | 100 | 7.02588e-21 | 81.8627 | cI00101 | KU superfamily       |
| Q#242 - >133440__F6AHOR | 206837 | 83  | 133 | 3.31127e-16 | 69.1511 | cI00101 | KU superfamily       |
| Q#247 - >134955__F6AHOR | 206837 | 58  | 111 | 5.90731e-18 | 73.7735 | cI00101 | KU superfamily       |
| Q#253 - >135085__F6AHOR | 206837 | 39  | 89  | 4.27222e-20 | 79.5515 | cI00101 | KU superfamily       |
| Q#260 - >136518__F6AHOR | 206834 | 1   | 36  | 2.36178e-07 | 44.5127 | cI00097 | KAZAL_FS superfamily |
| Q#261 - >136518__F6AHOR | 206837 | 58  | 111 | 1.66725e-18 | 75.3143 | cI00101 | KU superfamily       |
| Q#266 - >137751__F6AHOR | 109750 | 35  | 76  | 0.000181238 | 36.6809 | cI02937 | Toxin_4 superfamily  |
| Q#271 - >139581__F6AHOR | 206834 | 57  | 97  | 9.22727e-07 | 42.9719 | cI00097 | KAZAL_FS superfamily |
| Q#271 - >139581__F6AHOR | 206837 | 111 | 149 | 0.000132683 | 37.2782 | cI00101 | KU superfamily       |
| Q#277 - >140265__F6AHOR | 206837 | 12  | 62  | 6.47335e-20 | 79.1663 | cI00101 | KU superfamily       |
| Q#283 - >141682__F6AHOR | 206837 | 85  | 141 | 8.17835e-10 | 51.0467 | cI00101 | KU superfamily       |
| Q#290 - >143363__F6AHOR | 206837 | 18  | 70  | 2.99638e-19 | 76.4699 | cI00101 | KU superfamily       |
| Q#296 - >146922__F6AHOR | 206837 | 49  | 102 | 1.02135e-18 | 76.0847 | cI00101 | KU superfamily       |
| Q#301 - >151351__F6AHOR | 206837 | 2   | 46  | 4.48254e-13 | 61.8323 | cI00101 | KU superfamily       |
| Q#307 - >155688__F6AHOR | 206837 | 26  | 75  | 3.22433e-13 | 61.0619 | cI00101 | KU superfamily       |
| Q#314 - >160976__F6AHOR | 206837 | 3   | 46  | 3.69575e-17 | 71.8475 | cI00101 | KU superfamily       |
| Q#321 - >161654__F6AHOR | 206837 | 41  | 94  | 2.8541e-17  | 71.8475 | cI00101 | KU superfamily       |
| Q#325 - >162371__F6AHOR | 206834 | 49  | 89  | 3.0378e-06  | 41.4311 | cI00097 | KAZAL_FS superfamily |
| Q#325 - >162371__F6AHOR | 206837 | 103 | 146 | 5.46051e-06 | 41.1301 | cI00101 | KU superfamily       |
| Q#332 - >162479__F6AHOR | 109750 | 42  | 83  | 5.26734e-05 | 37.4513 | cI02937 | Toxin_4 superfamily  |
| Q#337 - >162713__F6AHOR | 206837 | 1   | 43  | 6.81175e-12 | 57.2099 | cI00101 | KU superfamily       |
| Q#337 - >162713__F6AHOR | 206834 | 71  | 111 | 5.47564e-08 | 46.1334 | cI00097 | KAZAL_FS superfamily |
| Q#343 - >166943__F6AHOR | 206837 | 42  | 94  | 2.84475e-16 | 69.1511 | cI00101 | KU superfamily       |
| Q#343 - >166943__F6AHOR | 206837 | 1   | 40  | 9.44599e-05 | 37.6634 | cI00101 | KU superfamily       |
| Q#351 - >169271__F6AHOR | 206837 | 44  | 97  | 2.10401e-16 | 69.9215 | cI00101 | KU superfamily       |
| Q#351 - >169271__F6AHOR | 206834 | 1   | 40  | 2.8903e-07  | 44.1426 | cI00097 | KAZAL_FS superfamily |
| Q#351 - >169271__F6AHOR | 206834 | 125 | 157 | 1.78342e-07 | 44.9778 | cI00097 | KAZAL_FS superfamily |
| Q#355 - >173288__F6AHOR | 206837 | 69  | 122 | 2.95369e-21 | 82.6331 | cI00101 | KU superfamily       |
| Q#361 - >175012__F6AHOR | 206837 | 15  | 67  | 8.1074e-17  | 70.3067 | cI00101 | KU superfamily       |
| Q#368 - >175091__F6AHOR | 109750 | 34  | 75  | 0.000263991 | 36.2957 | cI02937 | Toxin_4 superfamily  |
| Q#378 - >180148__F6AHOR | 206837 | 83  | 136 | 1.77432e-14 | 64.1435 | cI00101 | KU superfamily       |
| Q#381 - >186037__F6AHOR | 206837 | 69  | 118 | 3.93996e-17 | 71.0771 | cI00101 | KU superfamily       |
| Q#385 - >186240__F6AHOR | 206837 | 41  | 94  | 6.26184e-18 | 73.7735 | cI00101 | KU superfamily       |
| Q#391 - >187106__F6AHOR | 206837 | 90  | 139 | 1.61877e-15 | 67.2251 | cI00101 | KU superfamily       |
| Q#399 - >190791__F6AHOR | 206837 | 69  | 118 | 5.06874e-17 | 71.0771 | cI00101 | KU superfamily       |
| Q#404 - >195376__F6AHOR | 206837 | 2   | 51  | 7.45294e-14 | 62.2175 | cI00101 | KU superfamily       |
| Q#416 - >197752__F6AHOR | 206837 | 49  | 98  | 7.28501e-15 | 65.2991 | cI00101 | KU superfamily       |
| Q#421 - >199000__F6AHOR | 109750 | 65  | 96  | 0.00227039  | 33.9845 | cI02937 | Toxin_4 superfamily  |
| Q#427 - >200465__F6AHOR | 206837 | 54  | 107 | 2.33429e-17 | 72.2327 | cI00101 | KU superfamily       |
| Q#435 - >203242__F6AHOR | 206837 | 41  | 94  | 4.73167e-18 | 74.5439 | cI00101 | KU superfamily       |
| Q#440 - >203423__F6AHOR | 206837 | 81  | 133 | 6.89083e-15 | 65.2991 | cI00101 | KU superfamily       |
| Q#440 - >203423__F6AHOR | 206837 | 36  | 79  | 4.94137e-06 | 41.0315 | cI00101 | KU superfamily       |
| Q#445 - >209785__F6AHOR | 206837 | 1   | 35  | 1.52168e-11 | 56.0543 | cI00101 | KU superfamily       |
| Q#445 - >209785__F6AHOR | 206834 | 68  | 102 | 7.62248e-06 | 40.2755 | cI00097 | KAZAL_FS superfamily |
| Q#446 - >209785__F6AHOR | 206868 | 110 | 153 | 1.66389e-05 | 39.2747 | cI00156 | WAP superfamily      |
| Q#453 - >212115__F6AHOR | 109750 | 64  | 105 | 4.30544e-06 | 40.9181 | cI02937 | Toxin_4 superfamily  |
| Q#464 - >217440__F6AHOR | 206837 | 49  | 102 | 1.80421e-17 | 72.2327 | cI00101 | KU superfamily       |
| Q#470 - >221150__F6AHOR | 206837 | 25  | 78  | 1.24784e-21 | 83.0183 | cI00101 | KU superfamily       |
| Q#477 - >223951__F6AHOR | 206837 | 114 | 156 | 5.51423e-18 | 73.7735 | cI00101 | KU superfamily       |
| Q#481 - >226390__F6AHOR | 206837 | 17  | 70  | 2.78045e-22 | 84.9442 | cI00101 | KU superfamily       |
| Q#487 - >230140__F6AHOR | 206837 | 142 | 163 | 6.47717e-06 | 41.0315 | cI00101 | KU superfamily       |

Table S4. Cont.

|                         |        |     |     |             |         |         |                      |
|-------------------------|--------|-----|-----|-------------|---------|---------|----------------------|
| Q#489 - >230140__F6AHOR | 206837 | 112 | 141 | 1.02787e-05 | 40.3597 | cl00101 | KU superfamily       |
| Q#494 - >235690__F6AHOR | 109750 | 42  | 83  | 3.16809e-05 | 38.6069 | cl02937 | Toxin_4 superfamily  |
| Q#504 - >238411__F6AHOR | 206837 | 118 | 175 | 3.03335e-12 | 58.3655 | cl00101 | KU superfamily       |
| Q#505 - >238669__F6AHOR | 206837 | 5   | 33  | 2.90435e-06 | 41.5153 | cl00101 | KU superfamily       |
| Q#507 - >238669__F6AHOR | 206837 | 31  | 53  | 5.08473e-05 | 38.3991 | cl00101 | KU superfamily       |
| Q#512 - >238782__F6AHOR | 206837 | 56  | 109 | 8.03087e-19 | 76.0847 | cl00101 | KU superfamily       |
| Q#517 - >244026__F6AHOR | 206834 | 113 | 147 | 3.51401e-07 | 44.1275 | cl00097 | KAZAL_FS superfamily |
| Q#519 - >244026__F6AHOR | 206837 | 26  | 79  | 1.16295e-16 | 70.3067 | cl00101 | KU superfamily       |
| Q#524 - >249757__F6AHOR | 206837 | 104 | 146 | 1.80106e-18 | 75.3143 | cl00101 | KU superfamily       |
| Q#536 - >250910__F6AHOR | 206837 | 31  | 84  | 6.37115e-17 | 71.0771 | cl00101 | KU superfamily       |
| Q#542 - >250961__F6AHOR | 206837 | 69  | 121 | 1.04399e-18 | 75.6995 | cl00101 | KU superfamily       |
| Q#542 - >250961__F6AHOR | 206837 | 127 | 152 | 0.000593445 | 35.3175 | cl00101 | KU superfamily       |
| Q#547 - >256926__F6AHOR | 206837 | 58  | 111 | 8.22329e-18 | 73.3883 | cl00101 | KU superfamily       |
| Q#554 - >257732__F6AHOR | 206837 | 101 | 158 | 1.20428e-12 | 59.1359 | cl00101 | KU superfamily       |
| Q#560 - >258498__F6AHOR | 206837 | 1   | 39  | 7.46997e-11 | 54.1283 | cl00101 | KU superfamily       |
| Q#565 - >259588__F6AHOR | 206837 | 24  | 76  | 1.57646e-16 | 69.9215 | cl00101 | KU superfamily       |
| Q#565 - >259588__F6AHOR | 206837 | 82  | 135 | 1.87548e-16 | 69.5363 | cl00101 | KU superfamily       |
| Q#571 - >260799__F6AHOR | 206837 | 51  | 102 | 7.66365e-16 | 68.3807 | cl00101 | KU superfamily       |
| Q#571 - >260799__F6AHOR | 206837 | 1   | 41  | 6.51182e-12 | 57.2099 | cl00101 | KU superfamily       |
| Q#577 - >263762__F6AHOR | 206837 | 42  | 94  | 3.05226e-18 | 74.5439 | cl00101 | KU superfamily       |
| Q#583 - >264832__F6AHOR | 206837 | 54  | 107 | 6.7575e-18  | 73.3883 | cl00101 | KU superfamily       |
| Q#591 - >265534__F6AHOR | 206834 | 50  | 90  | 3.35103e-08 | 46.5186 | cl00097 | KAZAL_FS superfamily |
| Q#591 - >265534__F6AHOR | 206837 | 1   | 22  | 2.51255e-05 | 38.8189 | cl00101 | KU superfamily       |
| Q#597 - >269593__F6AHOR | 206837 | 1   | 45  | 4.4545e-15  | 65.6843 | cl00101 | KU superfamily       |
| Q#602 - >271395__F6AHOR | 206837 | 55  | 93  | 1.60981e-10 | 52.9727 | cl00101 | KU superfamily       |
| Q#603 - >271395__F6AHOR | 206837 | 88  | 107 | 0.00594247  | 32.2706 | cl00101 | KU superfamily       |
| Q#608 - >271511__F6AHOR | 206837 | 23  | 76  | 2.75696e-16 | 69.5363 | cl00101 | KU superfamily       |
| Q#608 - >271511__F6AHOR | 206834 | 104 | 130 | 5.3583e-05  | 38.0442 | cl00097 | KAZAL_FS superfamily |
| Q#614 - >276325__F6AHOR | 206837 | 57  | 110 | 2.38738e-17 | 71.8475 | cl00101 | KU superfamily       |
| Q#619 - >280586__F6AHOR | 206837 | 94  | 143 | 1.62218e-08 | 47.9651 | cl00101 | KU superfamily       |
| Q#626 - >281064__F6AHOR | 206837 | 75  | 104 | 3.54631e-09 | 49.5059 | cl00101 | KU superfamily       |
| Q#631 - >284257__F6AHOR | 206837 | 42  | 95  | 1.20464e-18 | 75.6995 | cl00101 | KU superfamily       |
| Q#638 - >285673__F6AHOR | 206837 | 81  | 124 | 1.16497e-08 | 47.9651 | cl00101 | KU superfamily       |
| Q#643 - >285843__F6AHOR | 206837 | 23  | 76  | 1.77535e-17 | 72.6179 | cl00101 | KU superfamily       |
| Q#643 - >285843__F6AHOR | 206834 | 104 | 144 | 2.47448e-09 | 49.9854 | cl00097 | KAZAL_FS superfamily |
| Q#650 - >289615__F6AHOR | 206837 | 98  | 114 | 2.25363e-05 | 38.4338 | cl00101 | KU superfamily       |
| Q#651 - >289615__F6AHOR | 206837 | 71  | 97  | 1.88375e-05 | 38.8189 | cl00101 | KU superfamily       |
| Q#655 - >292620__F6AHOR | 206837 | 59  | 109 | 3.31015e-16 | 69.1511 | cl00101 | KU superfamily       |
| Q#661 - >292829__F6AHOR | 206837 | 22  | 74  | 2.30299e-17 | 72.2327 | cl00101 | KU superfamily       |
| Q#661 - >292829__F6AHOR | 206837 | 80  | 123 | 1.25074e-07 | 45.2687 | cl00101 | KU superfamily       |
| Q#669 - >293184__F6AHOR | 109750 | 64  | 105 | 3.3565e-05  | 38.6069 | cl02937 | Toxin_4 superfamily  |
| Q#674 - >298272__F6AHOR | 109750 | 34  | 75  | 4.25402e-05 | 38.2217 | cl02937 | Toxin_4 superfamily  |
| Q#681 - >300778__F6AHOR | 206837 | 95  | 129 | 1.37772e-08 | 47.9651 | cl00101 | KU superfamily       |
| Q#687 - >309346__F6AHOR | 206837 | 122 | 144 | 1.27691e-06 | 42.5723 | cl00101 | KU superfamily       |
| Q#692 - >318170__F6AHOR | 206837 | 61  | 112 | 1.92079e-19 | 77.6255 | cl00101 | KU superfamily       |
| Q#699 - >318836__F6AHOR | 206837 | 102 | 155 | 2.28781e-14 | 64.1435 | cl00101 | KU superfamily       |
| Q#699 - >318836__F6AHOR | 206834 | 3   | 43  | 1.09845e-06 | 42.5867 | cl00097 | KAZAL_FS superfamily |
| Q#699 - >318836__F6AHOR | 206837 | 57  | 100 | 3.56805e-06 | 41.5153 | cl00101 | KU superfamily       |
| Q#704 - >326281__F6AHOR | 206837 | 40  | 93  | 4.90486e-17 | 71.4623 | cl00101 | KU superfamily       |
| Q#704 - >326281__F6AHOR | 206834 | 1   | 36  | 3.76773e-08 | 46.5186 | cl00097 | KAZAL_FS superfamily |
| Q#709 - >327156__F6AHOR | 206837 | 2   | 46  | 1.14494e-14 | 64.5287 | cl00101 | KU superfamily       |

Table S4. Cont.

|                         |        |     |     |             |         |         |                      |
|-------------------------|--------|-----|-----|-------------|---------|---------|----------------------|
| Q#715 - >329908__F6AHOR | 109750 | 62  | 103 | 7.46574e-05 | 37.8365 | cI02937 | Toxin_4 superfamily  |
| Q#721 - >331879__F6AHOR | 206868 | 132 | 152 | 0.00398108  | 32.8024 | cI00156 | WAP superfamily      |
| Q#723 - >331879__F6AHOR | 206837 | 1   | 34  | 3.25886e-11 | 55.2839 | cI00101 | KU superfamily       |
| Q#723 - >331879__F6AHOR | 206834 | 62  | 102 | 7.61108e-10 | 51.141  | cI00097 | KAZAL_FS superfamily |
| Q#729 - >337351__F6AHOR | 206837 | 86  | 118 | 3.02573e-10 | 52.5875 | cI00101 | KU superfamily       |
| Q#734 - >339734__F6AHOR | 206837 | 110 | 156 | 4.0693e-18  | 74.1587 | cI00101 | KU superfamily       |
| Q#740 - >344132__F6AHOR | 206837 | 21  | 73  | 1.20737e-17 | 73.3883 | cI00101 | KU superfamily       |
| Q#746 - >345772__F6AHOR | 206837 | 117 | 147 | 1.55806e-08 | 47.9651 | cI00101 | KU superfamily       |
| Q#747 - >345772__F6AHOR | 206837 | 98  | 116 | 0.00574358  | 33.041  | cI00101 | KU superfamily       |
| Q#751 - >346986__F6AHOR | 206837 | 49  | 89  | 4.06482e-12 | 57.9803 | cI00101 | KU superfamily       |
| Q#751 - >346986__F6AHOR | 206837 | 4   | 47  | 1.44711e-07 | 45.2687 | cI00101 | KU superfamily       |
| Q#758 - >352982__F6AHOR | 206837 | 49  | 101 | 1.75979e-21 | 83.0183 | cI00101 | KU superfamily       |
| Q#762 - >352982__F6AHOR | 150200 | 71  | 98  | 0.00156131  | 34.1869 | cI09685 | VMA21 superfamily    |
| Q#763 - >353606__F6AHOR | 206837 | 80  | 120 | 6.972e-07   | 42.9575 | cI00101 | KU superfamily       |
| Q#764 - >353606__F6AHOR | 206834 | 26  | 56  | 3.46658e-06 | 41.1663 | cI00097 | KAZAL_FS superfamily |
| Q#771 - >353983__F6AHOR | 109750 | 33  | 74  | 5.62871e-05 | 37.8365 | cI02937 | Toxin_4 superfamily  |
| Q#775 - >357651__F6AHOR | 206837 | 56  | 109 | 1.71418e-18 | 74.9291 | cI00101 | KU superfamily       |
| Q#782 - >358541__F6AHOR | 206837 | 61  | 100 | 3.33309e-11 | 55.2839 | cI00101 | KU superfamily       |
| Q#793 - >361798__F6AHOR | 206837 | 45  | 98  | 1.03794e-17 | 73.0031 | cI00101 | KU superfamily       |
| Q#793 - >361798__F6AHOR | 206837 | 2   | 39  | 7.49209e-12 | 56.8247 | cI00101 | KU superfamily       |
| Q#801 - >366690__F6AHOR | 109750 | 64  | 105 | 2.122e-05   | 39.3773 | cI02937 | Toxin_4 superfamily  |
| Q#805 - >368814__F6AHOR | 206837 | 21  | 74  | 7.56244e-17 | 70.6919 | cI00101 | KU superfamily       |
| Q#805 - >368814__F6AHOR | 206863 | 95  | 123 | 2.56183e-06 | 42.0178 | cI00150 | TY superfamily       |
| Q#812 - >373573__F6AHOR | 206837 | 31  | 84  | 1.43349e-16 | 69.9215 | cI00101 | KU superfamily       |
| Q#812 - >373573__F6AHOR | 206834 | 112 | 143 | 2.01953e-07 | 44.5926 | cI00097 | KAZAL_FS superfamily |
| Q#818 - >376106__F6AHOR | 206837 | 1   | 47  | 4.804e-20   | 79.1663 | cI00101 | KU superfamily       |
| Q#825 - >377697__F6AHOR | 206837 | 75  | 110 | 2.18039e-11 | 56.0543 | cI00101 | KU superfamily       |
| Q#831 - >381474__F6AHOR | 109750 | 44  | 85  | 2.78065e-05 | 38.6069 | cI02937 | Toxin_4 superfamily  |
| Q#836 - >388614__F6AHOR | 109750 | 66  | 107 | 4.89182e-05 | 38.2217 | cI02937 | Toxin_4 superfamily  |
| Q#842 - >392330__F6AHOR | 206837 | 134 | 162 | 4.08116e-09 | 49.1207 | cI00101 | KU superfamily       |
| Q#848 - >394828__F6AHOR | 206837 | 99  | 118 | 5.40659e-06 | 40.7449 | cI00101 | KU superfamily       |
| Q#849 - >394828__F6AHOR | 206837 | 113 | 137 | 1.14898e-05 | 39.9745 | cI00101 | KU superfamily       |
| Q#855 - >396124__F6AHOR | 206837 | 23  | 76  | 2.24533e-16 | 69.5363 | cI00101 | KU superfamily       |
| Q#855 - >396124__F6AHOR | 206834 | 104 | 128 | 0.000105153 | 37.2738 | cI00097 | KAZAL_FS superfamily |
| Q#859 - >398513__F6AHOR | 206837 | 25  | 78  | 1.49928e-21 | 83.0183 | cI00101 | KU superfamily       |
| Q#867 - >401808__F6AHOR | 109750 | 64  | 85  | 0.000879574 | 35.5253 | cI02937 | Toxin_4 superfamily  |
| Q#871 - >404905__F6AHOR | 206837 | 60  | 112 | 8.35602e-17 | 71.0771 | cI00101 | KU superfamily       |
| Q#878 - >406361__F6AHOR | 109750 | 53  | 94  | 4.31536e-05 | 38.2217 | cI02937 | Toxin_4 superfamily  |
| Q#883 - >408752__F6AHOR | 206837 | 23  | 66  | 4.1575e-07  | 44.1131 | cI00101 | KU superfamily       |
| Q#883 - >408752__F6AHOR | 206837 | 68  | 97  | 1.69882e-05 | 39.5547 | cI00101 | KU superfamily       |
| Q#885 - >408752__F6AHOR | 206837 | 92  | 119 | 3.24854e-08 | 46.8095 | cI00101 | KU superfamily       |
| Q#890 - >409393__F6AHOR | 206837 | 41  | 91  | 1.41359e-16 | 70.3067 | cI00101 | KU superfamily       |
| Q#895 - >413841__F6AHOR | 206837 | 93  | 125 | 9.42803e-09 | 48.7355 | cI00101 | KU superfamily       |
| Q#901 - >413913__F6AHOR | 206837 | 2   | 46  | 2.12942e-11 | 55.6691 | cI00101 | KU superfamily       |
| Q#907 - >418618__F6AHOR | 206834 | 49  | 89  | 2.8721e-08  | 46.5186 | cI00097 | KAZAL_FS superfamily |
| Q#907 - >418618__F6AHOR | 206837 | 1   | 21  | 0.000233204 | 36.5078 | cI00101 | KU superfamily       |
| Q#907 - >418618__F6AHOR | 206868 | 96  | 139 | 0.00893084  | 31.9559 | cI00156 | WAP superfamily      |
| Q#913 - >419072__F6AHOR | 206837 | 62  | 84  | 8.80356e-06 | 40.6463 | cI00101 | KU superfamily       |
| Q#914 - >419072__F6AHOR | 206837 | 86  | 112 | 5.85842e-10 | 51.8171 | cI00101 | KU superfamily       |
| Q#920 - >419247__F6AHOR | 206837 | 1   | 47  | 4.40458e-19 | 76.8551 | cI00101 | KU superfamily       |
| Q#925 - >421339__F6AHOR | 206837 | 23  | 76  | 6.59404e-17 | 71.0771 | cI00101 | KU superfamily       |

Table S4. Cont.

|                          |        |     |     |             |         |         |                      |
|--------------------------|--------|-----|-----|-------------|---------|---------|----------------------|
| Q#925 - >421339__F6AHOR  | 206834 | 104 | 136 | 1.27689e-06 | 42.6666 | cI00097 | KAZAL_FS superfamily |
| Q#932 - >421660__F6AHOR  | 206837 | 80  | 133 | 3.87898e-17 | 71.4623 | cI00101 | KU superfamily       |
| Q#932 - >421660__F6AHOR  | 206837 | 28  | 74  | 1.73782e-14 | 64.1435 | cI00101 | KU superfamily       |
| Q#937 - >422304__F6AHOR  | 206837 | 90  | 133 | 7.35693e-08 | 46.0391 | cI00101 | KU superfamily       |
| Q#939 - >422304__F6AHOR  | 206834 | 32  | 66  | 1.22069e-06 | 42.6666 | cI00097 | KAZAL_FS superfamily |
| Q#939 - >422304__F6AHOR  | 206837 | 134 | 161 | 1.5989e-05  | 39.5547 | cI00101 | KU superfamily       |
| Q#944 - >424241__F6AHOR  | 206837 | 58  | 111 | 6.35668e-18 | 73.7735 | cI00101 | KU superfamily       |
| Q#949 - >426449__F6AHOR  | 206837 | 5   | 57  | 8.89994e-19 | 75.6995 | cI00101 | KU superfamily       |
| Q#950 - >426449__F6AHOR  | 206837 | 77  | 106 | 1.57167e-09 | 50.2763 | cI00101 | KU superfamily       |
| Q#957 - >428248__F6AHOR  | 109750 | 31  | 72  | 0.000132678 | 36.6809 | cI02937 | Toxin_4 superfamily  |
| Q#961 - >432797__F6AHOR  | 206837 | 31  | 84  | 1.81981e-21 | 83.0183 | cI00101 | KU superfamily       |
| Q#967 - >435285__F6AHOR  | 206837 | 55  | 91  | 1.37061e-09 | 50.6615 | cI00101 | KU superfamily       |
| Q#973 - >436730__F6AHOR  | 206837 | 92  | 145 | 1.84033e-21 | 83.0183 | cI00101 | KU superfamily       |
| Q#981 - >437310__F6AHOR  | 206837 | 35  | 87  | 1.43356e-16 | 69.9215 | cI00101 | KU superfamily       |
| Q#986 - >437369__F6AHOR  | 206837 | 55  | 106 | 9.00227e-20 | 78.7811 | cI00101 | KU superfamily       |
| Q#991 - >438161__F6AHOR  | 206837 | 96  | 139 | 9.48882e-11 | 53.7431 | cI00101 | KU superfamily       |
| Q#997 - >439437__F6AHOR  | 206837 | 109 | 151 | 1.03117e-14 | 64.9139 | cI00101 | KU superfamily       |
| Q#1005 - >444641__F6AHOR | 206837 | 78  | 115 | 1.05223e-09 | 51.0467 | cI00101 | KU superfamily       |
| Q#1009 - >444778__F6AHOR | 206837 | 61  | 113 | 4.69655e-23 | 87.2554 | cI00101 | KU superfamily       |
| Q#1017 - >446516__F6AHOR | 109750 | 52  | 93  | 1.63268e-05 | 39.3773 | cI02937 | Toxin_4 superfamily  |
| Q#1023 - >448262__F6AHOR | 206837 | 25  | 77  | 1.18255e-19 | 78.0107 | cI00101 | KU superfamily       |
| Q#1028 - >448805__F6AHOR | 206837 | 55  | 107 | 3.06189e-18 | 74.9291 | cI00101 | KU superfamily       |
| Q#1034 - >449621__F6AHOR | 206837 | 36  | 85  | 1.32744e-18 | 76.0847 | cI00101 | KU superfamily       |
| Q#1045 - >454341__F6AHOR | 206837 | 37  | 89  | 8.987e-20   | 78.7811 | cI00101 | KU superfamily       |
| Q#1051 - >458453__F6AHOR | 206837 | 71  | 124 | 1.44789e-21 | 83.4035 | cI00101 | KU superfamily       |
| Q#1058 - >459665__F6AHOR | 206837 | 113 | 155 | 5.14627e-15 | 65.6843 | cI00101 | KU superfamily       |
| Q#1065 - >465507__F6AHOR | 206837 | 58  | 107 | 1.57754e-17 | 72.6179 | cI00101 | KU superfamily       |
| Q#1071 - >465535__F6AHOR | 109750 | 64  | 88  | 0.000144277 | 37.8365 | cI02937 | Toxin_4 superfamily  |
| Q#1075 - >468848__F6AHOR | 206837 | 103 | 116 | 0.000561972 | 35.7027 | cI00101 | KU superfamily       |
| Q#1076 - >468848__F6AHOR | 206837 | 29  | 72  | 1.1097e-08  | 48.3503 | cI00101 | KU superfamily       |
| Q#1077 - >468848__F6AHOR | 206837 | 78  | 101 | 0.000162471 | 37.2435 | cI00101 | KU superfamily       |
| Q#1081 - >471349__F6AHOR | 206837 | 85  | 122 | 1.52082e-07 | 44.8835 | cI00101 | KU superfamily       |
| Q#1083 - >471349__F6AHOR | 206837 | 1   | 40  | 1.4487e-14  | 64.5287 | cI00101 | KU superfamily       |
| Q#1087 - >474922__F6AHOR | 206837 | 81  | 115 | 1.05842e-08 | 48.3503 | cI00101 | KU superfamily       |
| Q#1094 - >475566__F6AHOR | 206837 | 85  | 128 | 1.45007e-13 | 61.8323 | cI00101 | KU superfamily       |
| Q#1100 - >481884__F6AHOR | 206837 | 35  | 78  | 5.25097e-07 | 43.7279 | cI00101 | KU superfamily       |
| Q#1101 - >481884__F6AHOR | 206837 | 96  | 131 | 9.86218e-12 | 56.8247 | cI00101 | KU superfamily       |
| Q#1105 - >484973__F6AHOR | 206837 | 19  | 65  | 1.01193e-15 | 67.9955 | cI00101 | KU superfamily       |
| Q#1105 - >484973__F6AHOR | 206837 | 71  | 110 | 1.84424e-11 | 56.0543 | cI00101 | KU superfamily       |
| Q#1112 - >485015__F6AHOR | 206837 | 58  | 111 | 1.83971e-18 | 74.9291 | cI00101 | KU superfamily       |
| Q#1117 - >488941__F6AHOR | 206837 | 60  | 113 | 5.20435e-17 | 71.0771 | cI00101 | KU superfamily       |
| Q#1124 - >491009__F6AHOR | 206837 | 80  | 103 | 0.000383141 | 35.6387 | cI00101 | KU superfamily       |
| Q#1125 - >491009__F6AHOR | 206837 | 49  | 85  | 3.43877e-12 | 57.9803 | cI00101 | KU superfamily       |
| Q#1130 - >491360__F6AHOR | 206837 | 74  | 102 | 6.68435e-10 | 52.2023 | cI00101 | KU superfamily       |
| Q#1131 - >491360__F6AHOR | 206837 | 11  | 52  | 1.87209e-14 | 64.9139 | cI00101 | KU superfamily       |
| Q#1137 - >492790__F6AHOR | 206837 | 3   | 55  | 2.66982e-16 | 69.1511 | cI00101 | KU superfamily       |
| Q#1137 - >492790__F6AHOR | 206837 | 61  | 104 | 2.0154e-12  | 58.3655 | cI00101 | KU superfamily       |
| Q#1142 - >503084__F6AHOR | 206837 | 37  | 88  | 2.12131e-17 | 72.2327 | cI00101 | KU superfamily       |
| Q#1149 - >504175__F6AHOR | 109750 | 54  | 95  | 9.33378e-05 | 37.8365 | cI02937 | Toxin_4 superfamily  |
| Q#1155 - >506530__F6AHOR | 206837 | 57  | 108 | 5.62632e-16 | 68.7659 | cI00101 | KU superfamily       |
| Q#1161 - >506891__F6AHOR | 109750 | 64  | 95  | 0.00263492  | 33.5993 | cI02937 | Toxin_4 superfamily  |

Table S4. Cont.

|                          |        |     |     |             |         |         |                      |
|--------------------------|--------|-----|-----|-------------|---------|---------|----------------------|
| Q#1167 - >512494__F6AHOR | 206837 | 100 | 151 | 5.52957e-09 | 49.1207 | cl00101 | KU superfamily       |
| Q#1172 - >517529__F6AHOR | 206837 | 58  | 108 | 4.33615e-14 | 62.9879 | cl00101 | KU superfamily       |
| Q#1177 - >521760__F6AHOR | 206837 | 1   | 45  | 2.70616e-16 | 69.9215 | cl00101 | KU superfamily       |
| Q#1183 - >531175__F6AHOR | 206837 | 38  | 57  | 2.78936e-06 | 42.6709 | cl00101 | KU superfamily       |
| Q#1185 - >531175__F6AHOR | 206837 | 4   | 34  | 2.12052e-08 | 48.3503 | cl00101 | KU superfamily       |
| Q#1191 - >531617__F6AHOR | 206837 | 101 | 134 | 7.60457e-12 | 56.8247 | cl00101 | KU superfamily       |
| Q#1197 - >534494__F6AHOR | 109750 | 64  | 88  | 7.18292e-05 | 38.6069 | cl02937 | Toxin_4 superfamily  |
| Q#1209 - >543217__F6AHOR | 206837 | 9   | 53  | 2.06407e-11 | 56.0543 | cl00101 | KU superfamily       |
| Q#1213 - >543244__F6AHOR | 206837 | 1   | 34  | 1.95167e-10 | 52.9727 | cl00101 | KU superfamily       |
| Q#1213 - >543244__F6AHOR | 206834 | 62  | 102 | 3.55734e-09 | 49.215  | cl00097 | KAZAL_FS superfamily |
| Q#1220 - >544895__F6AHOR | 109750 | 53  | 84  | 0.00213969  | 33.9845 | cl02937 | Toxin_4 superfamily  |
| Q#1225 - >544997__F6AHOR | 206837 | 47  | 90  | 2.70615e-16 | 70.6919 | cl00101 | KU superfamily       |
| Q#1231 - >545861__F6AHOR | 206837 | 1   | 54  | 1.63721e-16 | 69.9215 | cl00101 | KU superfamily       |

© 2012 by the authors; licensee MDPI, Basel, Switzerland. This article is an open access article distributed under the terms and conditions of the Creative Commons Attribution license (<http://creativecommons.org/licenses/by/3.0/>).
